# Supplementary material for: SNP rs2596542G&gt;A in MICA is associated with risk of hepatocellular carcinoma: a meta-analysis
Source: Oxford University Press journal article supplement (doi:10.1042/bsr20181400), 2019-04-09
Supplement: bsr-2018-1400_supp.pdf [file bsr-2018-1400_supp.pdf]

**Supplementary Table 1. Score of quality assessment**

| <b>Criteria*</b>                                  | <b>Score</b> |
|---------------------------------------------------|--------------|
| <b>Representativeness of case</b>                 |              |
| Selected from population cancer registry          | 2            |
| Selected from hospital                            | 1            |
| No method of selection described                  | 0            |
| <b>Representativeness of control</b>              |              |
| Population-based                                  | 3            |
| Blood donors                                      | 2            |
| Hospital-based                                    | 1            |
| Not described                                     | 0            |
| <b>Ascertainment of HCC case</b>                  |              |
| Histopathologic confirmation or CT/MRI*           | 2            |
| by patient medical record                         | 1            |
| Not described                                     | 0            |
| <b>Control selection</b>                          |              |
| Controls matched with cases by age and sex        | 2            |
| Controls matched with cases only by age or by sex | 1            |
| Not matched or not described                      | 0            |
| <b>Genotyping examination</b>                     |              |
| Genotyping done blindly and quality control       | 2            |
| Only genotyping done blindly or quality control   | 1            |
| Unblinded and without quality control             | 0            |
| <b>HWE</b>                                        |              |
| HWE in the control group                          | 1            |
| HWD in the control group or not mentioned         | 0            |
| <b>Total sample size</b>                          |              |
| > 1000                                            | 3            |
| 501 - 1000                                        | 2            |
| 201 - 500                                         | 1            |
| ≤ 200                                             | 0            |

\*Slightly modified according to the NCCN Clinical Practice Guidelines in oncology (NCCN Guidelines). Hepatobiliary Cancers. Version 1. 2018.

\*\*Study quality is defined as low if  $QS \leq 9$  or high if  $QS > 9$ .

**Supplementary Table 2** Subgroup analysis results by quality score of association between *rs2596542G>A* and HCV-induced HCC

| Sample | Comparison   | Number of Studies | Test of Heterogeneity |                | Meta-analysis Results |       | Comparison Model |
|--------|--------------|-------------------|-----------------------|----------------|-----------------------|-------|------------------|
|        |              |                   | P(Q-test)             | I <sup>2</sup> | OR (95% CI)           | P     |                  |
| High*  | GG vs. AA    | 2                 | 0.513                 | 0.00%          | 0.608(0.526, 0.702)   | 0.000 | FEM              |
|        | GA vs. AA    | 2                 | 0.769                 | 0.00%          | 0.849(0.737, 0.977)   | 0.022 | FEM              |
|        | GA+GG vs. AA | 2                 | 0.601                 | 0.00%          | 0.724(0.634, 0.827)   | 0.000 | FEM              |
|        | GG vs. GA+AA | 2                 | 0.517                 | 0.00%          | 0.687(0.624, 0.757)   | 0.000 | FEM              |
|        | G vs. A      | 2                 | 0.446                 | 0.00%          | 0.756(0.706, 0.810)   | 0.000 | FEM              |
| Low*   | GG vs. AA    | 5                 | 0.014                 | 67.90%         | 0.818(0.436, 1.536)   | 0.532 | REM              |
|        | GA vs. AA    | 5                 | 0.237                 | 27.70%         | 0.698(0.512, 0.950)   | 0.022 | FEM              |
|        | GA+GG vs. AA | 5                 | 0.123                 | 44.90%         | 0.760(0.570, 1.013)   | 0.061 | FEM              |
|        | GG vs. GA+AA | 5                 | 0.003                 | 74.50%         | 0.972(0.611, 1.545)   | 0.903 | REM              |
|        | G vs. A      | 5                 | 0.011                 | 69.50%         | 0.934(0.694, 1.257)   | 0.653 | REM              |

**Abbreviations:** FEM, Fixed-effect Model; REM, Random-effect Model.

\*High: QS>9.      \*\*Low: QS≤9.

**Supplementary Table 3** Subgroup analysis results by quality score of association between *rs2596542G>A* and HCC among Asian cohort

| Sample | Comparison   | Number of Studies | Test of Heterogeneity |                | Meta-analysis Results |       | Comparison Model |
|--------|--------------|-------------------|-----------------------|----------------|-----------------------|-------|------------------|
|        |              |                   | P(Q-test)             | I <sup>2</sup> | OR (95% CI)           | P     |                  |
| High*  | GG vs. AA    | 4                 | 0.000                 | 85.80%         | 0.798(0.550, 1.158)   | 0.235 | REM              |
|        | GA vs. AA    | 4                 | 0.209                 | 33.90%         | 0.898(0.792, 1.017)   | 0.090 | FEM              |
|        | GA+GG vs. AA | 4                 | 0.007                 | 75.40%         | 0.862(0.659, 1.127)   | 0.277 | REM              |
|        | GG vs. GA+AA | 4                 | 0.000                 | 88.40%         | 0.839(0.653, 1.077)   | 0.169 | REM              |
|        | G vs. A      | 4                 | 0.000                 | 89.80%         | 0.882(0.724, 1.075)   | 0.214 | REM              |
| Low**  | GG vs. AA    | 4                 | 0.265                 | 24.40%         | 0.616(0.443, 0.856)   | 0.004 | FEM              |
|        | GA vs. AA    | 4                 | 0.229                 | 30.50%         | 0.657(0.474, 0.912)   | 0.012 | FEM              |
|        | GA+GG vs. AA | 4                 | 0.226                 | 31.10%         | 0.636(0.468, 0.865)   | 0.004 | FEM              |
|        | GG vs. GA+AA | 4                 | 0.589                 | 0.00%          | 0.838(0.676, 1.038)   | 0.106 | FEM              |
|        | G vs. A      | 4                 | 0.419                 | 0.00%          | 0.814(0.697, 0.951)   | 0.010 | FEM              |

**Abbreviations:** FEM, Fixed-effect Model; REM, Random-effect Model.

\*High: QS>9.      \*\*Low: QS≤9.
